# Supplementary material for: Pelargonium sidoides radix extract EPs 7630 reduces rhinovirus infection through modulation of viral binding proteins on human bronchial epithelial cells
Source: PLoS One. 2019 Feb 1;14(2):e0210702. doi: 10.1371/journal.pone.0210702 (PMC6358071; doi:10.1371/journal.pone.0210702)

## S2 A

| controls   |            | + RV16     |            |            |            |
|------------|------------|------------|------------|------------|------------|
| Cell lines | Control    |            | Eps 0.1    | Eps 1      | EPS 10     |
| H01        | 100        | 53         | 33         | 53         | 75         |
| H02        | 100        | 16         | 0          | 64         | 97         |
| H03        | 100        | 24         | 12         | 75         | 76         |
| H04        | 100        | 53         | 25         | 52         | 86         |
| H05        | 100        | 49         | 53         | 55         | 74         |
| H06        | 100        | 35         | 14         | 76         | 93         |
| mean       | 100.00     | 38.33      | 22.83      | 62.50      | 83.50      |
| SD         | 0.00       | 15.87      | 18.63      | 10.93      | 9.97       |
| SEM        | 44.7213595 | 17.1431878 | 10.2113771 | 27.9508497 | 37.3423352 |
| t-test     |            | 0.00021655 |            |            | 0.00461695 |
|            |            |            | 0.01790025 | 0.06393842 |            |
|            |            |            |            |            |            |
| asthma     |            | + RV16     |            |            |            |
| Cell lines | Control    |            | Eps 0.1    | Eps 1      | EPS 10     |
| A01        | 100        | 69         | 21         | 37         | 84         |
| A02        | 100        | 21         | 43         | 93         | 95         |
| A03        | 100        | 34         | 28         | 47         | 52         |
| A04        | 100        | 49         | 61         | 87         | 85         |
| A05        | 100        | 25         | 35         | 53         | 82         |
| A06        | 100        | 34         | 42         | 43         | 68         |
| mean       | 100.00     | 38.67      | 38.33      | 60.00      | 77.67      |
| SD         | 0.00       | 17.72      | 13.91      | 23.89      | 15.27      |
| SEM        | 44.7213595 | 17.292259  | 17.1431878 | 26.8328157 | 34.7335893 |
| t-test     |            | 0.0003747  |            |            | 0.00857782 |
|            |            |            | 0.97523456 | 0.19041286 |            |
|            |            |            |            |            |            |
| COPD       |            | + RV16     |            |            |            |
| Cell lines | Control    |            | Eps 0.1    | Eps 1      | EPS 10     |
| CD01       | 100        | 37         | 27         | 56         | 85         |
| CD02       | 100        | 25         | 43         | 57         | 94         |
| CD03       | 100        | 58         | 19         | 43         | 75         |
| CD04       | 100        | 36         | 28         | 43         | 98         |
| CD05       | 100        | 41         | 56         | 64         | 72         |
| CD06       | 100        | 25         | 83         | 42         | 57         |
| mean       | 100.00     | 37.00      | 42.67      | 50.83      | 80.17      |
| SD         | 0.00       | 12.21      | 23.77      | 9.37       | 15.25      |
| SEM        | 44.7213595 | 16.546903  | 19.0811134 | 22.7333578 | 35.8516232 |
| t-test     |            | 5.5198E-05 |            |            | 0.00323675 |
|            |            |            | 0.09223635 |            |            |
|            |            |            | 0.69044594 |            |            |

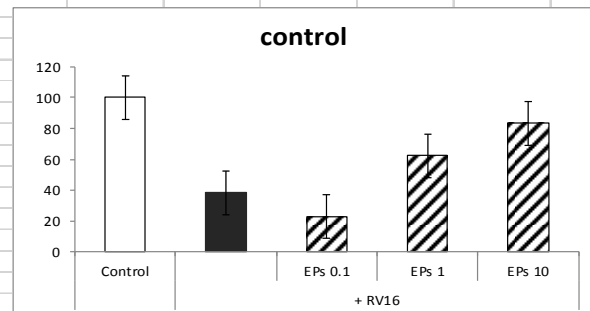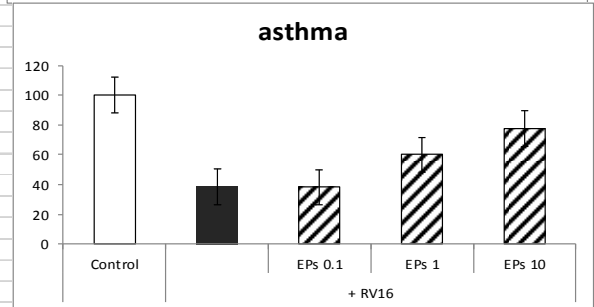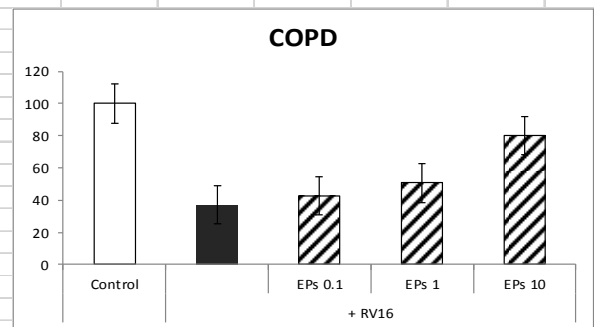

## S2 B

|            |            | + RV16     |            |            |  |
|------------|------------|------------|------------|------------|--|
| Control    |            | EPs 0.1    | EPs 1      | EPs 10     |  |
| 3624       | 15342      | 14837      | 11253      | 10958      |  |
| 4253       | 16453      | 16003      | 16453      | 9476       |  |
| 3142       | 14258      | 15542      | 12746      | 11726      |  |
| 5264       | 15329      | 14253      | 14352      | 13246      |  |
| 6473       | 15649      | 16278      | 15534      | 11823      |  |
| 3241       | 13241      | 14253      | 12134      | 10058      |  |
| 4332.83    | 15045.33   | 15194.33   | 13745.33   | 11214.50   |  |
| 1308.92    | 1130.48    | 877.39     | 2034.98    | 1355.33    |  |
| 1937.70197 | 6728.47762 | 6795.11244 | 6147.09994 | 5015.27687 |  |
|            | 3.0766E-06 |            |            | 0.00305741 |  |
|            |            |            | 0.08519665 |            |  |
|            |            | 0.71775837 |            |            |  |
|            |            |            |            |            |  |
|            |            | + RV16     |            |            |  |
| Control    |            | EPs 0.1    | EPs 1      | EPs 10     |  |
| 3827       | 11869      | 11521      | 10237      | 7584       |  |
| 4425       | 15243      | 15648      | 14239      | 9568       |  |
| 5938       | 12134      | 13286      | 13247      | 11425      |  |
| 1425       | 14960      | 13243      | 13287      | 10853      |  |
| 6312       | 14352      | 14342      | 15344      | 11028      |  |
| 4938       | 16453      | 15342      | 14638      | 9685       |  |
| 4477.50    | 14168.50   | 13897.00   | 13498.67   | 10023.83   |  |
| 1758.08    | 1814.42    | 1536.13    | 1788.74    | 1409.58    |  |
| 2002.39887 | 6336.34583 | 6214.92734 | 6036.78725 | 4482.79455 |  |
|            | 0.00032798 |            |            | 0.00458976 |  |
|            |            | 0.54868644 | 0.28270086 |            |  |
|            |            |            |            |            |  |
|            |            | + RV16     |            |            |  |
| Control    |            | EPs 0.1    | EPs 1      | EPs 10     |  |
| 4132       | 11859      | 12748      | 7563       | 9485       |  |
| 1758       | 15243      | 15342      | 11057      | 11049      |  |
| 3726       | 12638      | 11947      | 14233      | 8475       |  |
| 1197       | 16043      | 14382      | 15243      | 9186       |  |
| 6253       | 14296      | 13456      | 9968       | 11723      |  |
| 3274       | 15263      | 12827      | 14253      | 10275      |  |
| 3390.00    | 14223.67   | 13450.33   | 12052.83   | 10032.17   |  |
| 1808.11    | 1645.63    | 1231.93    | 3008.91    | 1215.89    |  |
| 1516.05409 | 6361.01711 | 6015.17193 | 5390.19093 | 4486.52133 |  |
|            | 0.00031658 |            |            | 0.00158078 |  |
|            |            | 0.08444945 |            |            |  |
|            |            | 0.17248595 |            |            |  |

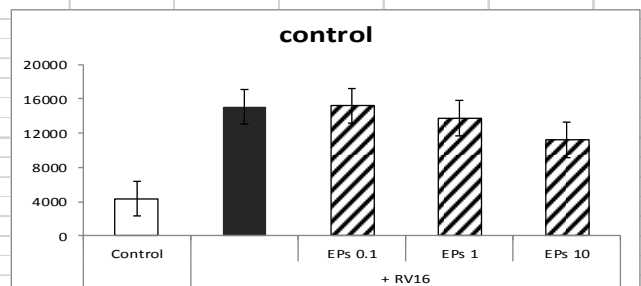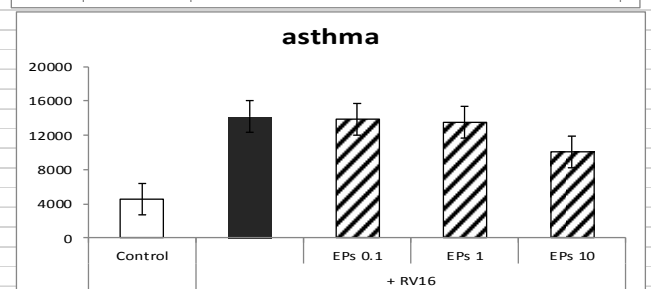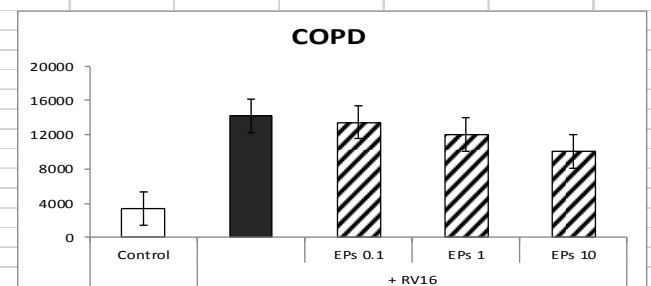

Supplement: S2 File — Table A: Number of surviving human bronchial epithelial cells after RV16 infection for 6 healthy controls (H01-H06), 6 asthma patients (A01-A06), and 6 COPD patients (CD01-CD06). Table B: Number of RV16 infected cells for the same patients presented in table A. Mean, S.D. and S.E.M. as well as Student’s t-test were performed by Excel program. (PDF) [file pone.0210702.s002.pdf]
