# Supplementary material for: Pelargonium sidoides radix extract EPs 7630 reduces rhinovirus infection through modulation of viral binding proteins on human bronchial epithelial cells
Source: PubMed Central journal article supplement (PMC6358071; doi:10.1371/journal.pone.0210702), 2019-02-01

# S5 A

| controls   |            |            |            |             |             |             |
|------------|------------|------------|------------|-------------|-------------|-------------|
| Cell lines | Control    | EPs 0.1    | EPs 1      | EPs 10      | RV16+EPs 10 | RV16 1 unit |
| H01        | 14524      | 14253      | 16123      | 16754       | 13726       | 16253       |
| H02        | 16453      | 15234      | 13256      | 17827       | 15386       | 17038       |
| H03        | 14328      | 14938      | 14993      | 15546       | 14232       | 16254       |
| H04        | 13298      | 12978      | 13276      | 16756       | 12879       | 15345       |
| H05        | 16453      | 15627      | 16574      | 18765       | 14253       | 17564       |
| H06        | 14425      | 13287      | 14432      | 15643       | 12875       | 16895       |
| mean       | 14913.50   | 14386.17   | 14775.67   | 16881.83    | 13891.83    | 16558.17    |
| SD         | 1271.46    | 1074.42    | 1398.07    | 1248.28     | 776.25      | 955.61      |
| SEM        | 6669.51996 | 6433.68932 | 6607.87902 | 7549.78538  | 6212.616733 | 7405.03725  |
| t-test     |            | 0.11780506 | 0.84312823 | 0.00278154  |             |             |
|            |            |            |            | 0.492840477 |             |             |
|            |            |            |            |             |             | 0.0223531   |
|            |            |            |            | 0.002001213 |             |             |
| asthma     |            |            |            |             |             |             |
| Cell lines | Control    | EPs 0.1    | EPs 1      | EPs 10      | RV16 1 unit | RV16+EPs 10 |
| A01        | 10293      | 11625      | 12437      | 15647       | 12867       | 18276       |
| A02        | 11176      | 10976      | 11526      | 13298       | 11627       | 16542       |
| A03        | 12625      | 13254      | 14237      | 16453       | 12918       | 16743       |
| A04        | 13276      | 13285      | 16754      | 18765       | 10786       | 15532       |
| A05        | 14436      | 13928      | 14453      | 14493       | 12431       | 14284       |
| A06        | 12987      | 13243      | 14938      | 16129       | 13327       | 15948       |
| mean       | 12465.50   | 12718.50   | 14057.50   | 15797.50    | 12326.00    | 16220.83    |
| SD         | 1497.98    | 1146.97    | 1858.47    | 1861.05     | 1334.15     | 950.41      |
| SEM        | 5574.74107 | 5687.88611 | 6286.70512 | 7064.85677  | 5512.354778 | 7254.1772   |
| t-test     |            | 0.38796837 | 0.02746439 | 0.0107165   |             |             |
|            |            |            |            | 0.673938556 |             |             |
|            |            |            |            |             |             | 0.8608037   |
|            |            |            |            | 0.021370315 |             |             |
| COPD       |            |            |            |             |             |             |
| Cell lines | Control    | EPs 0.1    | EPs 1      | EPs 10      | RV16+EPs 10 | RV16 1 unit |
| CD01       | 12847      | 12524      | 16253      | 17625       | 13243       | 15643       |
| CD02       | 11093      | 12978      | 16483      | 16948       | 12413       | 17265       |
| CD03       | 13287      | 12775      | 14263      | 15342       | 14236       | 15495       |
| Cd04       | 12423      | 11293      | 13928      | 13328       | 13297       | 16354       |
| CD05       | 12294      | 13253      | 15243      | 17265       | 11524       | 14938       |
| CD06       | 11964      | 12764      | 14423      | 14993       | 12756       | 15039       |
| mean       | 12318.00   | 12597.83   | 15098.83   | 15916.83    | 12911.50    | 15789.00    |
| SD         | 755.82     | 684.22     | 1076.57    | 1654.37     | 882.30      | 917.68      |
| SEM        | 5508.77707 | 5633.92234 | 6752.40354 | 7118.22426  | 5774.198338 | 7061.05546  |
| t-test     |            | 0.56771994 | 0.00730463 | 0.0058178   |             |             |
|            |            |            |            | 0.877152653 |             |             |
|            |            |            |            |             |             | 0.10334685  |
|            |            |            |            | 0.001996698 |             |             |

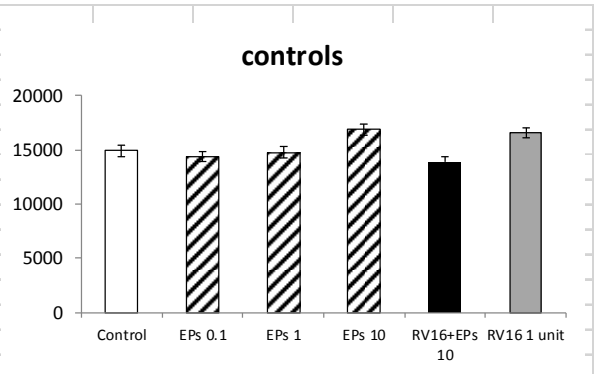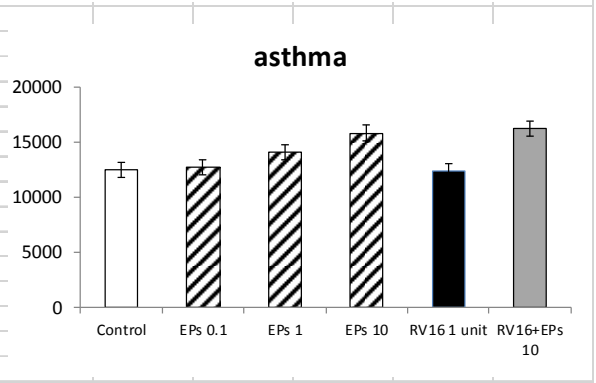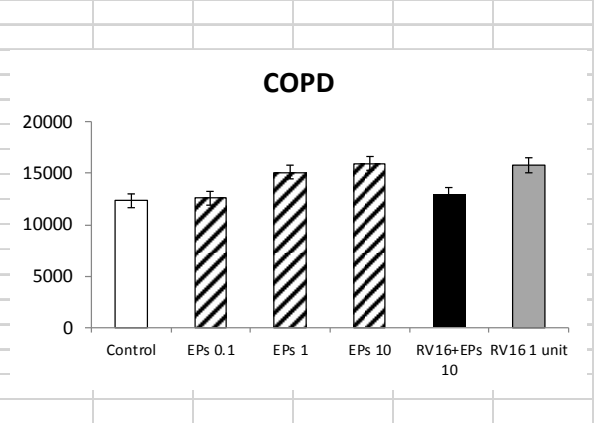

S5 B

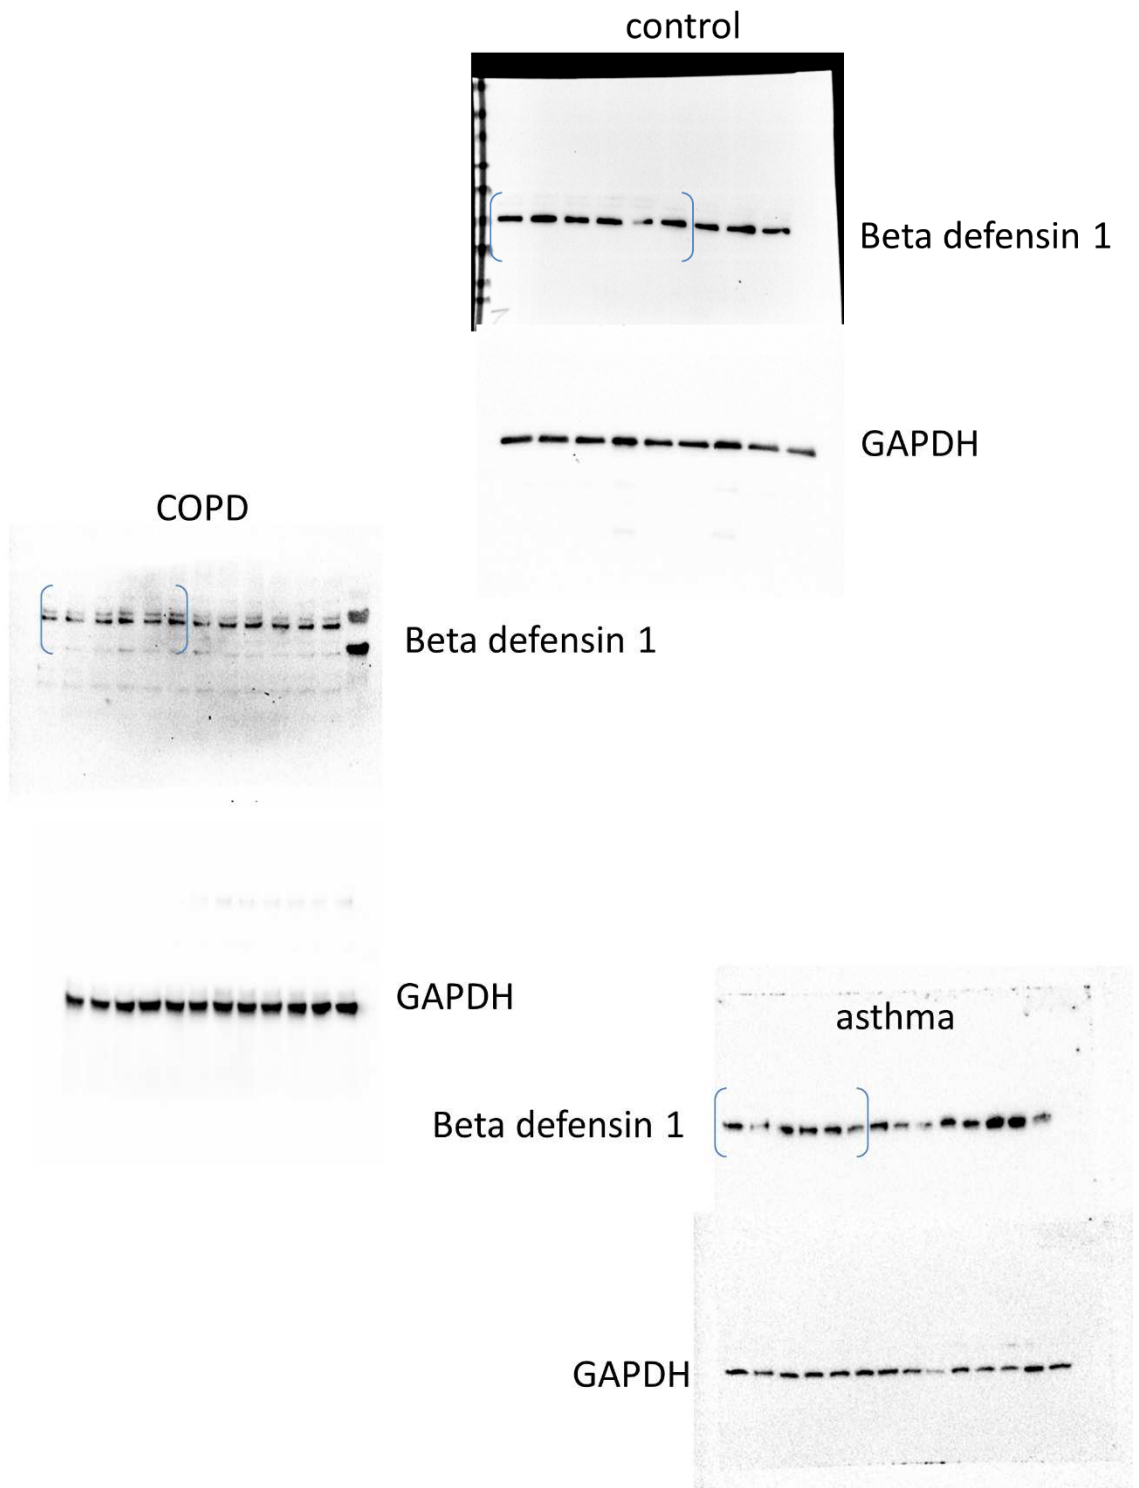

Supplement: pone.0210702.s005.pdf [file pone.0210702.s005.pdf]
