# Supplementary material for: Pelargonium sidoides radix extract EPs 7630 reduces rhinovirus infection through modulation of viral binding proteins on human bronchial epithelial cells
Source: PubMed Central journal article supplement (PMC6358071; doi:10.1371/journal.pone.0210702), 2019-02-01

S4 B

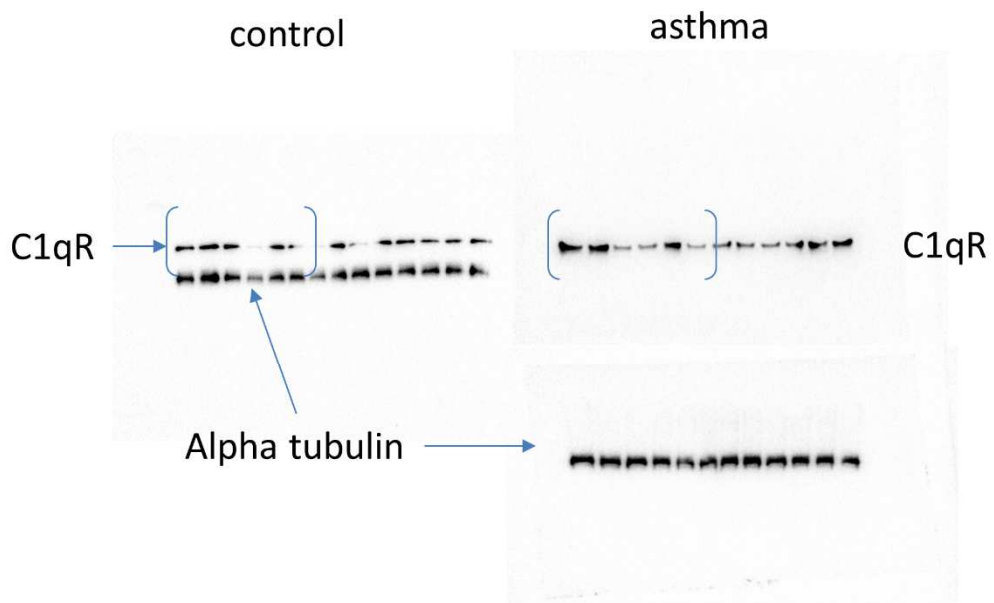

COPD

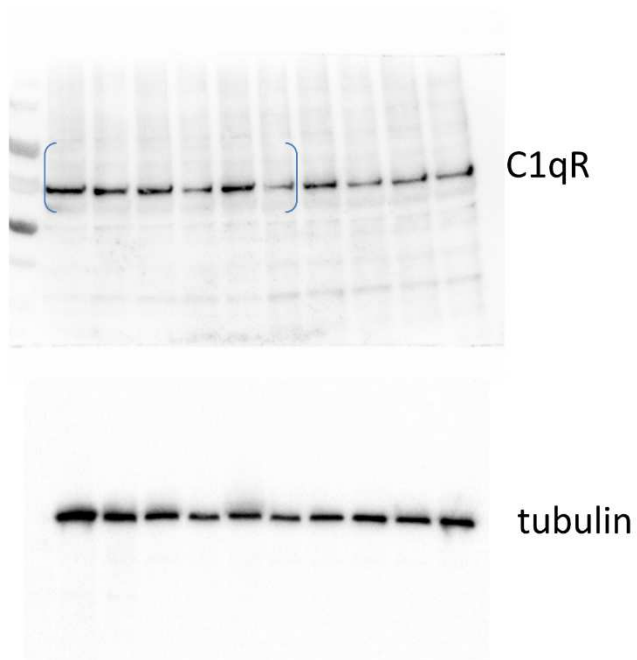

Supplement: pone.0210702.s004.pdf [file pone.0210702.s004.pdf]
